# Supplementary material for: Tracking cell lineages in 3D by incremental deep learning
Source: eLife. 2022 Jan 6;11:e69380. doi: 10.7554/eLife.69380 (PMC8741210; doi:10.7554/eLife.69380)
Supplement: Supplementary file 1. — The training speed is affected by the distribution of annotations because the algorithm contains a try-and-error process for cropping, in which the nucleus periphery labels are forced to appear with the nucleus center labels. [file elife-69380-supp1.xlsx]

## Sheet: Sheet1
Dataset		CE1	CE2	PH
Input size	voxels	708x512x35	712x512x31	1024x500x12
	timepoints	195	190	504
Prediction	Patch size	544x384x28	544x384x24	1024x500x12
	Number of patches	8	8	1
	Speed	6 sec/timepoint	5 sec/timepoint	2 sec/timepoint
Training	Patch size	384x384x16	384x384x16	384x384x12
	Number of patches per epoch	10	10	10
	Speed	24 sec/epoch	23 sec/epoch	22 sec/epoch
