# Supplementary material for: Tracking cell lineages in 3D by incremental deep learning
Source: eLife. 2022 Jan 6;11:e69380. doi: 10.7554/eLife.69380 (PMC8741210; doi:10.7554/eLife.69380)
Supplement: Supplementary file 2. — Incremental training was performed by transferring the training parameters from the model pre-trained with the CE datasets. Linking performance on dividing cells is scored separately. [file elife-69380-supp2.xlsx]

## Sheet: Sheet1
		Training from scratch	Incremental training from pre-trained model	Nearest neighbour
False positive	all	905	959	2093
	cell division	11	16	16
False negative	all	1349	1329	1991
	cell division	232	306	327
Training time		31 h	4 min	-
