# Supplementary material for: Tracking cell lineages in 3D by incremental deep learning
Source: eLife. 2022 Jan 6;11:e69380. doi: 10.7554/eLife.69380 (PMC8741210; doi:10.7554/eLife.69380)
Supplement: Supplementary file 3. — Columns correspond to the datasets analysed in Figure 3 and rows indicate the image datasets included in the training. In each case, the test image data were excluded from training. The Fluo-C3DH-A549 (Castilla et al., 2019), Fluo-C3DH-H157 (Maška et al., 2013), Fluo-N3DH-CHO (Dzyubachyk et al., 2010), Fluo-N3DH-CE (Murray et al., 2008) datasets are from the Cell Tracking Challenge (Maška et al., 2014). [file elife-69380-supp3.xlsx]

## Sheet: Sheet1
	CE1	PH	ORG1/ORG2	MDA231
Fluo-C3DH-A549	v	v	v	v
Fluo-C3DH-H157	v	v	v	v
Fluo-N3DH-CHO	v	v	v	v
Fluo-C3DL-MDA231	v	v	v
Fluo-N3DH-CE (CE1 and CE2)		v	v	v
PH	v		v	v
