# Supplementary material for: Tracking cell lineages in 3D by incremental deep learning
Source: eLife. 2022 Jan 6;11:e69380. doi: 10.7554/eLife.69380 (PMC8741210; doi:10.7554/eLife.69380)
Supplement: Supplementary file 4. — These parameters were extracted from “config.json” and “thresholds.json” generated by the software. [file elife-69380-supp4.xlsx]

## Sheet: Sheet1
Mode	Parameter name	Parameter value
Training	n_dim	3
	axes	“ZYXC”
	n_channel_in	1
	n_channel_out	97
	train_checkpoint	"weights_best.h5"
	train_checkpoint_last	"weights_last.h5"
	train_checkpoint_epoch	"weights_now.h5"
	n_rays	96
	grid	[1, 2, 2]
	anisotropy	[11.11111111111111, 1.0, 1.0]
	backbone	“unet”
	rays_json/name	“Rays_GoldenSpiral”
	rays_json/kwargs/n	96
	rays_json/kwargs/anisotropy	[11.11111111111111, 1.0, 1.0]
	n_classes	null
	unet_n_depth	2
	unet_kernel_size	[3, 3, 3]
	unet_n_filter_base	32
	unet_n_conv_per_depth	2
	unet_pool	[2, 2, 2]
	unet_activation	“relu”
	unet_last_activation	“relu”
	unet_batch_norm	FALSE
	unet_dropout	0
	unet_prefix	“”
	net_conv_after_unet	128
	net_input_shape	[null, null, null, 1]
	net_mask_shape	[null, null, null, 1]
	train_patch_size	[24, 96, 96]
	train_background_reg	0.0001
	train_foreground_only	0.9
	train_sample_cache	TRUE
	train_dist_loss	“mae”
	train_loss_weights	[1, 0.2]
	train_class_weights	[1, 1]
	train_epochs	400
	train_steps_per_epoch	100
	train_learning_rate	0.0003
	train_batch_size	2
	train_n_val_patches	null
	train_tensorboard	TRUE
	train_reduce_lr/factor	0.5
	train_reduce_lr/patience	40
	train_reduce_lr/min_delta	0
	use_gpu	FALSE
Prediction	prob	0.501483
	nms	0.3
