# Supplementary material for: Tracking cell lineages in 3D by incremental deep learning
Source: eLife. 2022 Jan 6;11:e69380. doi: 10.7554/eLife.69380 (PMC8741210; doi:10.7554/eLife.69380)
Supplement: Supplementary file 5. — Size and scale are represented in the format [X]x[Y]x[Z]. [file elife-69380-supp5.xlsx]

## Sheet: Sheet1
Dataset name	#	Original size	Training block size	Validation block size	Scale (μm)	Background threshold
Fluo-C3DH-A549	1	350x300x29	350x300x16	350x300x24	0.126x0.126x1.0	1
	2	400x270x28	384x270x16	400x270x24	0.126x0.126x1.0	1
Fluo-C3DH-H157	1	992x832x35	384x384x16	512x512x24	0.126x0.126x0.5	1
	2	992x832x80	384x384x16	512x512x24	0.126x0.126x0.5	1
Fluo-C3DL-MDA231	1	512x512x30	384x384x16	512x512x24	1.242x1.242x6.0	1
	2	512x512x30	384x384x16	512x512x24	1.242x1.242x6.0	1
Fluo-N3DH-CE	1	708x512x35	384x384x16	512x512x24	0.09x0.09x1.0	1
	2	712x512x31	384x384x16	512x512x24	0.09x0.09x1.0	1
Fluo-N3DH-CHO	1	512x443x5	384x384x5	512x443x5	0.202x0.202x1.0	1
	2	512x443x5	384x384x5	512x443x5	0.202x0.202x1.0	1
PH	-	1024x500x12	384x384x12	512x510x12	0.31x0.31x2.48	0.03
