# Supplementary material for: Tracking cell lineages in 3D by incremental deep learning
Source: eLife. 2022 Jan 6;11:e69380. doi: 10.7554/eLife.69380 (PMC8741210; doi:10.7554/eLife.69380)
Supplement: Supplementary file 6. — Size and scale are represented in the format [X]x[Y]x[Z]. [file elife-69380-supp6.xlsx]

## Sheet: Sheet1
Dataset name	Original size	Block size	Learning rate	dsup (μm)	rmin (μm)	rmax (μm)
CE1	708x512x35	544x384x28	0.001	2	0.5	3
PH	1024x500x12	768x384x12	0.01	5	0.5	5
ORG1	585x546x76	384x384x24	0.001	3	1.5	10
ORG2	512x512x31	384x384x24	0.001	3	1	5
MDA231	512x443x5	384x384x5	0.01	10	3	20
